# Supplementary material
Source: PubMed Central journal article supplement (PMC2048694)
Supplement: plntcell_tpc.107.051821_1.pdf [file plntcell_tpc.107.051821_1.pdf]

**Supplemental Table 1. Nucleotide sequences for oligonucleotides or primers used.**

| <b>Oligo Name</b>  | <b>Nucleotide Sequence (5'→3')</b>   | <b>Purpose</b>                                                                                                                               |
|--------------------|--------------------------------------|----------------------------------------------------------------------------------------------------------------------------------------------|
| KanF               | CAA GATGGATTGCACGCAGGTTCTCC          | To detect a transgene carrying kanamycin-resistance gene                                                                                     |
| KanR               | CTCGTCAAGAAGGCCGATAGAAGGCCGA         | To detect a transgene carrying kanamycin-resistance gene                                                                                     |
| At4g16890realtimeF | GCCGGATATGATCTTCGGAA                 | <i>SNC1</i> primer for realtime PCR                                                                                                          |
| At4g16890realtimeR | CGGCAAGCTCTTCAATCATG                 | <i>SNC1</i> primer for realtime PCR                                                                                                          |
| New890RealTime     | 6FAM-TGGCCTAGTGAAGCAG                | <i>SCN1</i> Taqman probe for realtime PCR                                                                                                    |
| act2realtimeF      | TCGGTGGTCCATTCTTGCT                  | <i>ACT2</i> primer for realtime PCR                                                                                                          |
| act2RealtimeR      | GCTTTTAAGCCTTTGATCTTGAGAG            | <i>ACT2</i> primer for realtime PCR                                                                                                          |
| act2Realtime       | NED-AGCACATTCCAGCAGATGTGGATCTCCAA    | <i>ACT2</i> Taqman probe for realtime PCR                                                                                                    |
| 860RealTimeF       | GAAGGCACTCAAGGCCTCATT                | <i>RPP4</i> primer for realtime PCR                                                                                                          |
| 860RealTimeR       | GACAATAATCCCACCATAGCCTTT             | <i>RPP4</i> primer for realtime PCR                                                                                                          |
| 860RealTime        | 6FAM-CTTGCCACGTAAACT                 | <i>RPP4</i> Taqman probe for realtime PCR                                                                                                    |
| 950RealtimeF       | TGGGTGCAAGCTCTCACAGA                 | <i>At4g16950</i> primer for realtime PCR                                                                                                     |
| 950RealtimeR       | TCATTAGGCCCGTTCAGAAGA                | <i>At4g16950</i> primer for realtime PCR                                                                                                     |
| 950 TaqmanProbe    | 6FAM-TAG CAA ATA TAG CCG GAG AGG     | <i>At4g16950</i> Taqman probe for realtime PCR                                                                                               |
| 860GATE            | CACCTGATTCCAGATCTTTCGAAGGCCA         | Amplification of PCR product used for the construction of a probe detecting <i>RPP5</i> locus <i>R</i> -gene sense transcripts               |
| 860smRNA           | GAGACAGGACTTCTTCAATGGCGGTGTT         | Amplification of PCR product used for the construction of a probe detecting <i>RPP5</i> locus <i>R</i> -gene sense transcripts               |
| GAPC F1            | CTGTCAACGACCCCTTCATG                 | <i>GAPC</i> amplification in multiplex PCR                                                                                                   |
| GAPC F1'           | GCTCGTCGCTGTCAACGACCCCTTCATC-DIDEOX) | Poisoning of <i>GAPC</i> amplification                                                                                                       |
| GAPC F2            | CACTTGAAGGGTGGTGCCAAG                | <i>GAPC</i> amplification in multiplex PCR                                                                                                   |
| GAPC F2'           | CTGCAGCTCACTTGAAGGGTGGTGCCAAG-DIDEO  | Poisoning of <i>GAPC</i> amplification                                                                                                       |
| GAPC R             | CCTGTTGTCGCCAACGAAGTC                | <i>GAPC</i> amplification in multiplex PCR and construction of antisense strand-specific cDNA libraries for <i>RPP5</i> locus <i>R</i> -gene |
| GAPC R'            | AATGCTCGACCTGTTGTCGCCAACGAAGTC-DIEO) | Poisoning of <i>GAPC</i> amplification                                                                                                       |
| balANTI            | GACAGAAATTCAGATC                     | Construction of antisense strand-specific cDNA libraries for <i>RPP5</i> locus <i>R</i> -genes                                               |
| SALK005767U        | TGGTTTGCCGAGAATAGCCAA                | <i>RPP4</i> antisense transcript amplification in multiplex PCR                                                                              |
| Salk_005767D2      | CGTTTCTGGGATGAGTTGTATGAAA            | <i>RPP4</i> antisense transcript amplification in multiplex PCR                                                                              |
| 890GATE3           | AGAGCTCTGAGGTACAATGACAG              | <i>SNC1</i> antisense transcript amplification in multiplex PCR                                                                              |
| 890GATE0           | CACCTGACAAAAGGCTGGAGGTTCTCCGAT       | <i>SNC1</i> antisense transcript amplification in multiplex PCR                                                                              |
| At4g16910LU3       | TGAGGATCGCGGGCGTTACAGAT              | <i>At4g1690</i> antisense transcript amplification in multiplex PCR                                                                          |
| At4g16900U1.5      | TCGTCTCATAGTGAGAGGCAACCAA            | <i>At4g1690</i> antisense transcript amplification in multiplex PCR                                                                          |
| Salk_123471D       | GTGGAGCTGCCATCTCAAGGT                | <i>RPP4</i> probe construction in RNA gel blot analysis                                                                                      |
| Salk_123471U       | GGCAAATAAACGAGGCCCTGA                | <i>RPP4</i> probe construction in RNA gel blot analysis                                                                                      |
| U6 snRNA           | CACGCATAAATCGAGAAATGGTCTGTCTC        | Construction of U6 probe                                                                                                                     |
| anitLRRsmRNA5'     | ACTTCTTCAATGGCGGTGTT                 | Amplification of PCR product used for the construction of a probe detecting <i>RPP5</i> locus <i>R</i> -gene antisense transcripts           |
| anitLRRsmRNA3'     | GAGACAGGTTCCAGATCTTTCGAAGGCCA        | Amplification of PCR product used for the construction of a probe detecting <i>RPP5</i> locus <i>R</i> -gene antisense transcripts           |
| siR1003            | AGACCGTGAGGCCAAACTTGGCATCCTGTCTC     | Construction of siR1003 probe                                                                                                                |
| tasiR255           | TTCTAAGTCCAACATAGCGTACCTGTCTC        | Construction of tasiR255 probe                                                                                                               |
| SNC1F              | GTGGAGTTCCTCATCTGAACATC              | with <i>SNC1</i> exon3R primer covering intron2 of <i>SNC1</i>                                                                               |
| SNC1exon3R         | CCCCGTAATAACCAATTTCTAGATATTGC        | with <i>SNC1</i> F primer covering intron2 of <i>SNC1</i>                                                                                    |
| SNC1exon3F         | CGTTCAAAGGCATGCGTAATCTG              | with <i>SNC1</i> R primer covering intron3 of <i>SNC1</i>                                                                                    |
| SNC1R              | CCCATTTTGATTGCTGGAAG                 | with <i>SNC1</i> exon3F primer covering intron3 of <i>SNC1</i>                                                                               |
| SNC1exon4F         | GGATGCCCGAATTTGAGAACTTT              | <i>SNC1</i> exon4F & <i>SNC1</i> intron4R covering intron4 of <i>SNC1</i>                                                                    |
| SNC1intron4R       | TCC AAG CGA CTG AAA AAA ACA TTG      | <i>SNC1</i> exon4F & <i>SNC1</i> intron4R covering intron4 of <i>SNC1</i>                                                                    |

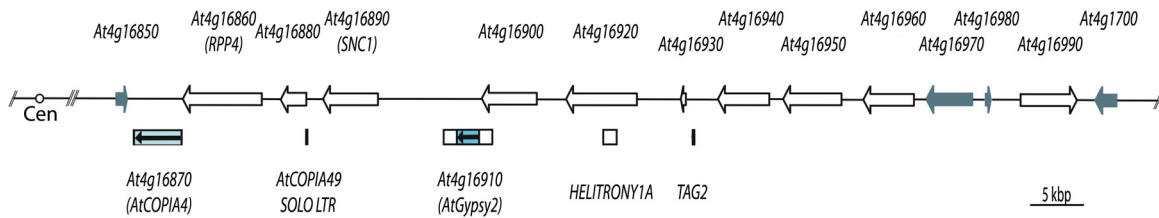

**Supplemental Figure 1.** Organization of *R-genes* located in the *RPP5* locus in the Columbia haplotype. Open and filled arrows indicate the *R-genes* and non-*R-genes* in the locus, respectively. Transposon originated sequences, which are demarcated by rectangles, are shown under the other genes in the locus. Arrows inside the filled rectangles indicate the polyprotein sequences of the *AtCopia4* and *AtGypsy2* retrotransposons. Start and end points of the arrows show the start and stop codons, respectively, and direction of arrows corresponds to the direction of transcription. Cen: centromere, LTR: long terminal repeat

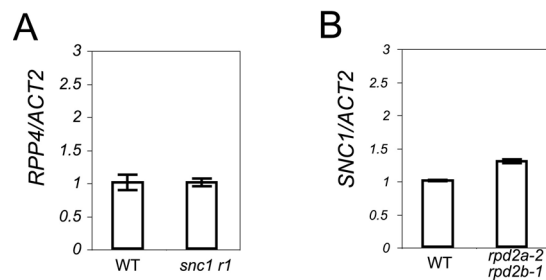

**Supplemental Figure 2.** The relative quantity of *RPP4* in the *sncl r1* mutant and that of *SNC1* in the *rpd2a-2 rpd2b-1* double mutant are not changed compared to wild type plants. WT: wild type plants. (A) *RPP4* transcript level, relative to *ACT2*, determined by real-time RT-PCR. (B) Relative *SNC1* transcript level determined by real-time RT-PCR.

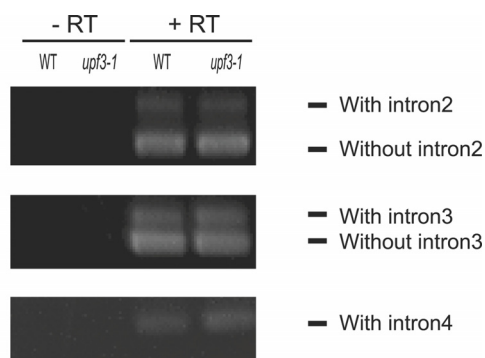

**Supplemental Figure 3.** *SNC1* transcripts are alternatively spliced to produce transcripts with or without introns. WT: wild type plants. The transcripts produced by intron-retention, in addition to the spliced intronless transcripts, were detected for *SNC1*.

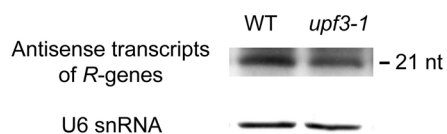

**Supplemental Figure 4.** No significant difference in the accumulation of small RNA species originating from sense transcripts of *RPP5* locus *R*-genes was detected between wild type plants and *upf3-1* homozygotes. U6 snRNA, an ~100 nt small nuclear RNA, was used as a loading control.

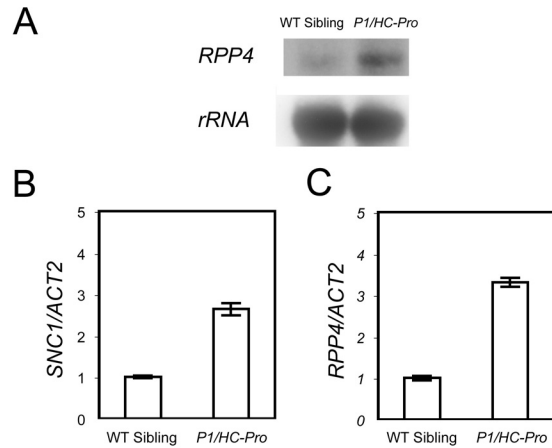

**Supplemental Figure 5.** Expression levels of *SNC1* and *RPP4* were elevated in transgenic plants over-expressing a viral suppressor of RNA silencing, P1/HC-Pro. WT sibling: WT plants that do not carry a transgene for P1/HC-Pro. *P1/HC-Pro*: hemizygous transgenic plants over-expressing P1/HC-Pro under the control of 35S promoter. (A) The result of RNA gel blot analysis using an *RPP4* probe. (B) and (C) *SNC1* and *RPP4* transcript levels, relative to *ACT2*, determined by real-time RT-PCR.

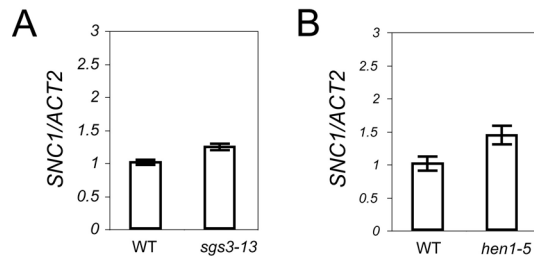

**Supplemental Figure 6.** The relative amounts of *SNC1* were comparable in the *sgs3-13*, *hen1-5*, and wild type plants (WT). (A) and (B) *SNC1* transcript level, relative to *ACT2*, determined by real-time RT-PCR.
